# Supplementary material for: Ethanol Sensing Properties and First Principles Study of Au Supported on Mesoporous ZnO Derived from Metal Organic Framework ZIF-8
Source: MDPI journal article supplement (doi:10.3390/s21134352), 2021-06-25
Supplement: s1 [file s1]

Highlights:

- Using ZIF-8 as a template effectively improves dispersion of Au particles on the surface of ZnO.
- Ethanol response of Au/ZnO-1.0 is superior to methanol, toluene, acetone, acetaldehyde and ammonia.
- Density functional theory is employed to analyze the adsorption characteristics of Au/ZnO.
