# Supplementary material for: Ethanol Sensing Properties and First Principles Study of Au Supported on Mesoporous ZnO Derived from Metal Organic Framework ZIF-8
Source: MDPI journal article supplement (doi:10.3390/s21134352), 2021-06-25
Supplement: s1 [file s1]

## Supporting information

# Ethanol Sensing Properties and First Principles Study of Au Supported on Mesoporous ZnO Derived from Metal Organic Framework ZIF-8

Yanli Kang <sup>1</sup>, Lu Zhang <sup>2</sup>, Wenhao Wang <sup>1</sup> and Feng Yu <sup>1,\*</sup>

<sup>1</sup> Key Laboratory for Green Processing of Chemical Engineering of Xinjiang Bingtuan, School of Chemistry and Chemical Engineering, Shihezi University, Shihezi 832003, P.R. China; 13040547128@163.com (Y.K.); 18299083557@163.com (W.W.)

<sup>2</sup> School of Science, Harbin Institute of Technology, Shenzhen 518055, P.R. China; 188925124@stu.hit.edu.cn (L. Z.)

\* Correspondence: yufeng05@mail.ipc.ac.cn (F.Y)

**Table S1.** Au element content in Au/ZnO samples (ICP).

| Materials  | Element | Content(wt.%) |
|------------|---------|---------------|
| ZnO        | --      | --            |
| Au/ZnO-0.5 | Au      | 0.9194        |
| Au/ZnO-1.0 | Au      | 1.7895        |
| Au/ZnO-1.5 | Au      | 2.9764        |

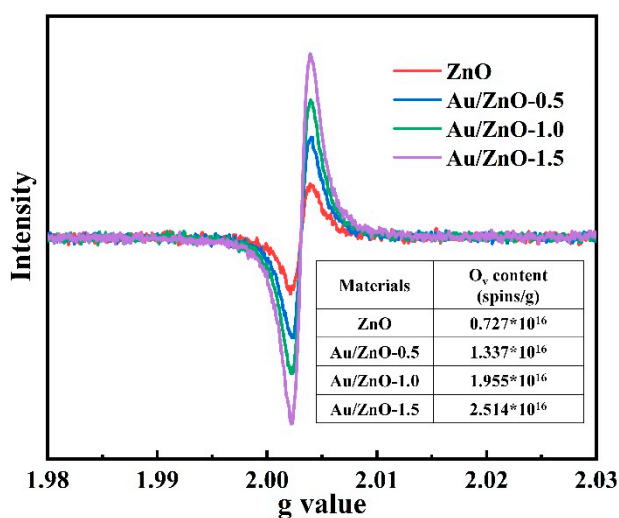

**Figure S1.** Quantitative analysis of oxygen vacancies in Au/ZnO.

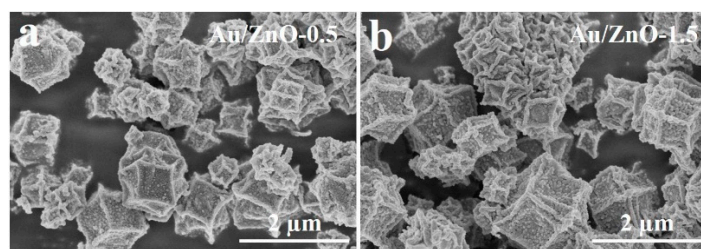

**Figure S2.** SEM images of (a) Au/ZnO-0.5, (b) Au/ZnO-1.5.

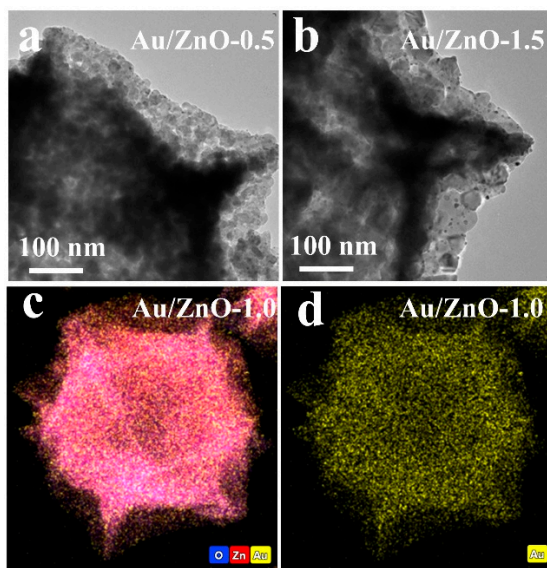

**Figure S3.** (a–b) TEM images of Au/ZnO-0.5 and Au/ZnO-1.5; (c–d) Mapping spectrum of Au/ZnO-1.0.

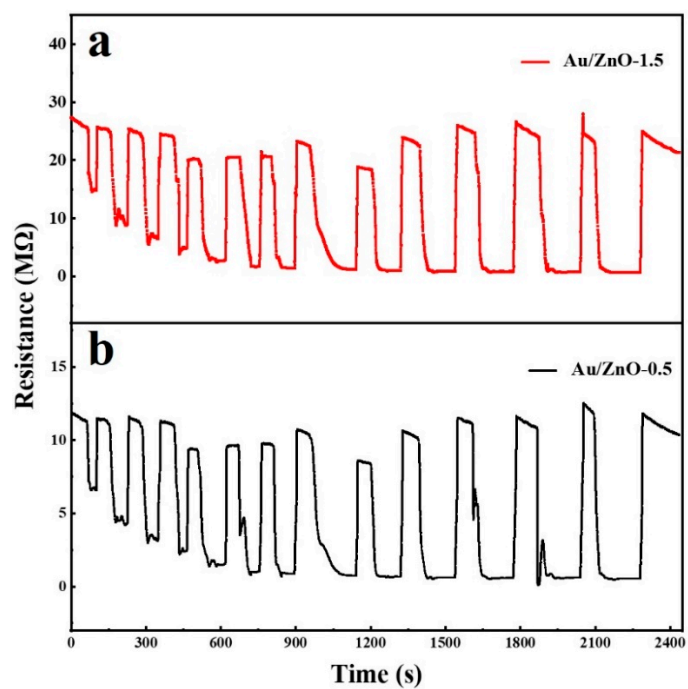

**Figure S4.** Dynamic response graph of (a) Au/ZnO-1.5 and (b) Au/ZnO-0.5 samples to ethanol (1-100 ppm).

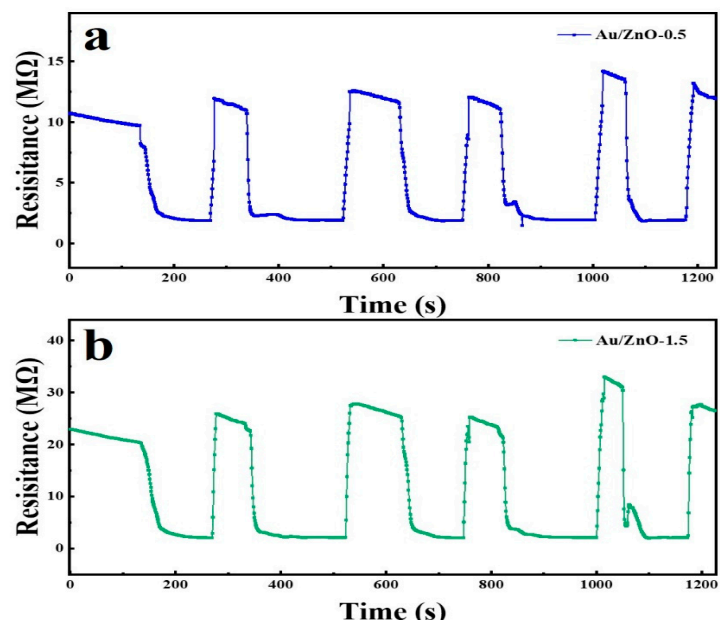

**Figure S5.** 5-cycle dynamic response-recovery curve of (a) Au/ZnO-0.5 and (b) Au/ZnO-1.5 samples to ethanol (100 ppm).
